# Supplementary material for: Learning Pathways and Students Performance: A Dynamic Complex System
Source: MDPI journal article supplement (doi:10.3390/e25020291), 2023-02-03
Supplement: s1 [file s1]

# Learning Pathways and Students Performance in Higher Education: A Complex System

## Supplementary material

### Box-covering implementation

A brief example of the computation of the box-covering code (see Code section) on the graph of Figure S1 (a) (represented by the adjacency matrix A) starts randomly selecting node three as the initial one (line 19 of the code). The column and row three are swapped with the column and row one (lines 20-42) of adjacency matrix A since the code takes the initial node as that in the first column and row. The NumberBoxes (line 43) function computes the minimum number of boxes to cover the network; the size of the boxes is between one to the diameter+1 of the network. In our example, the diameter is four. This function needs the number of nodes (nnodes), the diameter+1 of the networks and a squared matrix (that contains the shortest path distance from two nodes in the network).

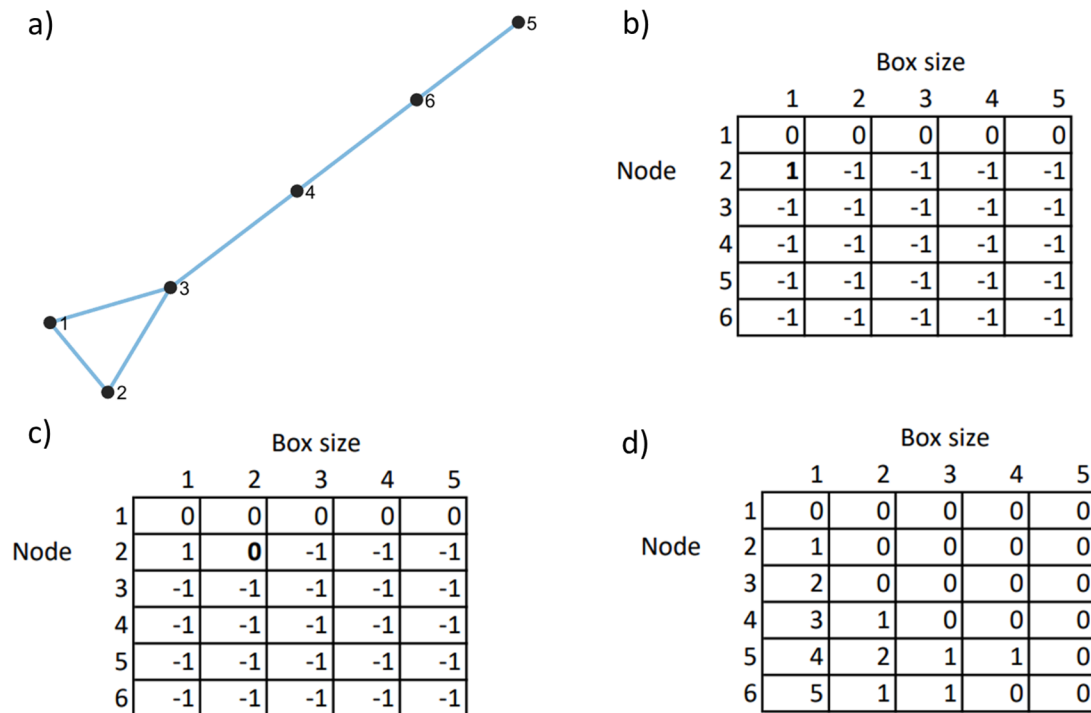

**Figure S1.** The box-covering implementation example of a) a graph. b) The result of the box number starting from node three for a box size one. c) The result of the box number for a box size two. d) The box assignment for the six nodes, varying the box size from one to five.

This function computes the Cmin ( $n \times m$  matrix, where  $n$  is the number of nodes and  $m = \text{diameter} + 1$ ) that summarises the box to that one node belongs given a box size. For example, column one of Cmin

contains a set of integers in each entry representing the box (of size one) to which a given node(row) belongs. It is a trivial case where each node belongs to a different box (of size one); thus, column vector one will contain  $n$  different numbers representing the boxes; in our example, six boxes of size one cover the network. The computation of the Cmin by the code starts initializing the matrix with -1 (lines 66-67). The start node always is assigned to the box with the number zero for every box size; thus, row one of the Cmin matrix is set to zero (line 69-71). Next, a box for the rest of the nodes is assigned (loop of line 72) for every box size (loop of line 74). It is equivalent to filling the row vector with the corresponding box starting from node two. The unusedcolor function carries out this task. Following our example, the current node is the two (line 73), and the box size is one (lb=1, line 74), so the unusedcolor function obtains the distance to the other nodes numbered less than the current node (loop of line 94 ). If the distance is equal to or greater than the size of the box (line 98), the current node (two) must be assigned to a different box (using the next integer) (lines 99 and 100). In our code, the vector usedcolors stores the index of the boxes that have been used. In our example, the distance between nodes two and three (the node tree was swapped in the adjacency matrix with node one) is one, so node two must be assigned to the next box. Since box zero was assigned to node three (this value was marked in usedcolors vector), the next box is that numbered with one (obtained by lines 109-111). Next, this value is assigned in the Cmin(2,1)=1, as shown in Figure S1 (b).

Now, the box size is increased (lb=2, line 72); thus, the distance between nodes two and three fails the condition of line 95; thus, both nodes belong to the same box; in this case, box zero; hence Cmin(2,2)=0, see Figure S1(C). The lb is increased again (lb=3, line 72) until lb=5; for these steps, the distance between node two and three is checked and fail the condition of line 95, so node 2 belongs to box zero for lb=[3,5]. The current node is moved to three (line 73 and lb=1 line 72) (numbered as 1 in Figure S1 (a) because of swapping). In this step of the loop of line 72, the unusedcolor function checks the distance between nodes 1,2,3 that are equal to one and equal to lb=1. Node three must belong to the next box available, the number two; see Figure S1 (d). The previous steps are repeated for the remaining nodes to produce the result in Figure S1 (d). The max value plus one of each column of Cmin is the minimum number of boxes of size equal to the number of the column (lines 50-51)

## Code

```

1 %Input%
2 % A: adjacency matrix of an undirected network
3 %Output %
4 %l: the diameter of the boxes [1, Diameter+1]
5 %Nb: the minimum number of boxes of diameter l to cover the network
6 %Cmin matrix that indicate the box of each node

```

---

```

7 function [l,Nb,Cmin]=boxcovering(A)
8     nnodes=size(A,1);
9     G=graph(A);
10    d=distances(G,'Method','unweighted');
11    diameter=max(d(isfinite(d))); % bug max(d(:));
12    Aor=A;
13    dor=d;
14    A=Aor;
15    d=dor;
16
17    %we simulate that the first node was picked out randomly
18    % by changing the adjacency matrix row and column
19    rvertex=randi(nnodes);
20    d1=d(1);
21    d2=d(rvertex);
22    d(1)=d2;
23    d(rvertex)=d1;
24    for i=1:nnodes
25        r1=A(1,i);
26        rr=A(rvertex,i);
27        A(1,i)=rr;
28        A(rvertex,i)=r1;
29    end
30    for i=1:nnodes
31        c1=A(i,1);
32        cr=A(i,rvertex);
33        A(i,1)=cr;
34        A(i,rvertex)=c1;
35    end
36
37    firstc=d(:,1);
38    d(:,1)=d(:,rvertex);
39    d(:,rvertex)=firstc;
40    firstr=d(1,:);
41    d(1,:)=d(rvertex,:);
42    d(rvertex,:)=firstr;
43    Cmin=NumberBoxes(nnodes,diameter+1,d);
44    %change the vertex to the final position
45    for w=1:length(Cmin(1,:))
46        aux=Cmin(1,w);
47        Cmin(1,w)=Cmin(rvertex,w);
48        Cmin(rvertex,w)=aux;
49    end
50    Nb=max(Cmin);
51    Nb=Nb+1;
52    l=1:length(Nb);
53    l=transpose(l);
54    Nb=transpose(Nb);
55 end
56 %computes the number of boxes from l=1 to lbmax
57 %Input%
58 %% nnodes : number of nodes in the network
59 %%lbmax : max diameter of the boxes, usually diameter +1
60 %d: minimum distance between nodes nodes
61 %Output%

```

---

```

62 %colors:Matrix of size= number of nodes X diamter+1. Indicates the nodes (rows)
63 % colour (box) for a given distance l (column)
64 function [colors]= NumberBoxes(nnodes,lbmax,d)
65 %creates matrix #nodes*lbmax distance lbmax
66 Cmin=zeros(nnodes,lbmax); %note that -1 indicates no color
67 Cmin=Cmin-1;%this is to remark that value -1 means that a node have not been colored
68 yet
69 %coloring actual vertex with 0
70 for i=1: lbmax
71     Cmin(1,i)=0;
72 end
73 for i=2:nnodes
74     actualvertex=i;
75     for lb=1:lbmax
76         ucolor=unusedcolor(actualvertex,lb,d,Cmin);
77         if ucolor~-=-1 %uclor =-1 means that any distance lij was less than lb
78             Cmin(actualvertex,lb)=ucolor;
79         else
80             Cmin(actualvertex,lb)=0;
81         end
82     end
83 end
84 colors=Cmin;
85 end
86
87 %finds the unused color for a given lb
88 function color= unusedcolor( i, lb, distances,Cmin)
89     nnodes=size(Cmin);
90     nnodes=nnodes(1,1);
91     color=-1;
92     distancechecked=0;
93     usedcolors=zeros(nnodes,1);
94     ucolor=-1;
95     for j=1:i-1
96         if isinf(distances(i,j))
97             continue;
98         end
99         if distances(i,j)>=lb
100             ucolor=Cmin(j,lb);
101             usedcolors(ucolor+1,1)=1;
102             distancechecked=distancechecked+1;
103         end
104     end
105     %search for the first value of usedcolor set to 0
106     if distancechecked==0 %any distance was >=lb so color must be 0
107         color=0;
108     else
109         for i=1:nnodes
110             if usedcolors(i,1)~=1 %we picked out the first color to be used
111                 color=i-1;
112                 break;
113             end
114         end
115     end
116 end

```

```

117
118
119 %input
120 %Table LogData: data of a semestral course with the following variables
121 %id unique identifier of a row
122 %userid: unique identification for a student
123 %idelement: identification for learning material in LMS
124 %name: name of learning material; idelement, name is a primary key
125 %star: start time for reviewing, solving, open the learning material
126 %endt: end time, the opposite of the start variable
127 %%%
128 %output
129 %LP: Learning pathway for each student by an adjacency matrix of directed
130 %CLP: Collective Learning Pathway
131 %network, they contain all the learning activities in the course although
132 %they have not been reviewed by a student
133 %Name: The name of the nodes of each network.
134 %Id The id of the row from log data
135
136 function [LP,CLP, Name, Id]=buildlearningpath(LogData)
137     Id=unique(LogData.userid(:));
138     Name=LogData(:,["idelement","name"]);
139     Name=unique(Name,"rows");
140     nodes=height(Name);
141     for i=1:length(Id)
142         A=sparse(nodes,nodes);
143         studentLD=LogData(LogData.userid()==Id(i,:));
144         [~,ia]=unique(studentLD.idelement);
145         namei=studentLD(ia,[3,4]); %names node of individual network
146         studentLD=sortrows(studentLD,["start","endt"]); %order rows by start=5 and end=6
147         if height(studentLD)>=1
148             item=studentLD(1,:);
149             [A,items]=sequential(item,studentLD,Name,A);
150             for j=1:height(studentLD)
151                 [A,items]=parallel(studentLD(j,:),studentLD(j:end,:),Name,A);
152             end
153         end
154         LP{i}=A;
155     end
156     for i=1:length(LP)
157         if i==1 CLP=LP{i};
158         else CLP=CLP+LP{i};
159     end
160 end
161
162
163 %search for parallel items based on start and end date
164 function [A,items]=parallel(item,LogData,Name,A)
165 items=LogData(LogData.start(:)>=item.start(1) &...
166     LogData.start(:)<item.endt(1) & LogData.id(:)~=item.id(1), :);
167 %while(~isempty(LogData))
168 [ixfrom,~]=find(Name.idelement()==item.idelement(1)...
169     & Name.name()==item.name(1));
170 if height(items)>=1
171     itemsc1=items(items.endt(:)>=item.endt(1),:);
172     itemsc2=items(items.endt(:)<item.endt(1),:);

```

---

```

173     itemsc3=items(items.start(:)>item.start(1) & ...
174         items.endt(:)==item.endt(1,:));
175     itemsc4=items(items.start(:)==item.start(1) & ...
176         items.endt(:)==item.endt(1,:));
177     for i=1:height(itemsc1)%case 1
178         [ixto,~]=find(Name.idelement(:)==itemsc1.idelement(i)...
179             & Name.name(:)==itemsc1.name(1));
180         A(ixfrom,ixto)=A(ixfrom,ixto)+1;
181         itemc1=itemsc1(i,:);
182         nextix=nextnode(itemc1,LogData,Name);
183         if nextix~-1
184             A(ixto,nextix)=A(ixfrom,ixto)+1;
185             [A,items]=parallel(itemc1,LogData,Name,A);
186             [A,items]=sequential(itemc1,LogData,Name,A);
187         end
188     end
189     for i=1:height(itemsc2) %case 2
190         [ixto,~]=find(Name.idelement(:)==itemsc2.idelement(i)...
191             & Name.name(:)==itemsc2.name(i));
192         A(ixfrom,ixto)=A(ixfrom,ixto)+1;
193         A(ixto,ixfrom)=A(ixto,ixfrom)+1;
194         [A,items]=parallel(itemsc2(i,:),LogData,Name,A);
195         [A,items]=sequential(itemsc2(i,:),LogData,Name,A);
196     end
197     for i=1:height(itemsc3) %case 3
198         [ixto,~]=find(Name.idelement(:)==itemsc3.idelement(i)...
199             && Name.name(:)==itemsc3.name(1));
200         A(ixfrom,ixto)=A(ixfrom,ixto)+1;
201         A(ixto,ixfrom)=A(ixto,ixfrom)+1;
202         [A,items]=parallel(itemsc3(i,:),LogData,Name,A);
203         [A,items]=sequential(itemsc3(i,:),LogData,Name,A);
204     end
205     for i=1:height(itemsc4)%case 4
206         [ixto,~]=find(Name.idelement(:)==itemsc4.idelement(i)...
207             & Name.name(:)==itemsc4.name(1));
208         A(ixfrom,ixto)=A(ixfrom,ixto)+1;
209         A(ixto,ixfrom)=A(ixto,ixfrom)+1;
210         [A,items]=parallel(itemsc4(i,:),LogData,Name,A);
211         [A,items]=sequential(itemsc4(i,:),LogData,Name,A);
212     end
213 end
214 %end
215 end
216 %search for non overlapping items based on start and end date
217 function [A,items]=sequential(item,LogData,Name,A)
218     items=LogData(LogData.start(:)>item.start(1) & ...
219         LogData.start(:)>=item.endt(1)& LogData.id(:)~=item.id(1,:));
220     while(~isempty(items))
221         [ixfrom,~]=find(Name.idelement(:)==item.idelement(1)...
222             & Name.name(:)==item.name(1));
223         if height(items)>=1
224             [ixto,~]=find(Name.idelement(:)==items.idelement(1)...
225                 & Name.name(:)==items.name(1));
226             A(ixfrom,ixto)=A(ixfrom,ixto)+1;
227             [A,items]=sequential(items(1,:),items,Name,A); %before LogData instead items
228         end

```

---

```
229     end
230 end
231
232 function nextix=nextnode(item,LogData,Name)
233 nexnode=LogData(LogData.start(:)>item.start(1) &...
234     LogData.start(:)>=item.endt(1)& LogData.id(:)~=item.id(1,:));
235 if(~isempty(nexnode))
236     [nextix,~]=find(Name.idelement(:)==nexnode.idelement(1)...
237         & Name.name(:)==nexnode.name(1));
238 else
239     nextix=-1; %not found
240 end
241 end
```
